# Supplementary material for: Chai-Qin-Cheng-Qi Decoction and Carbachol Improve Intestinal Motility by Regulating Protein Kinase C-Mediated Ca2+ Release in Colonic Smooth Muscle Cells in Rats with Acute Necrotising Pancreatitis
Source: PubMed Central journal article supplement (PMC5424168; doi:10.1155/2017/5864945), 2017-04-26
Supplement: 5864945.f1.pdf [file 5864945.f1.pdf]

**Supplementary Materials include one Figure.**

**Figure S1:** Morphological observation of isolated colonic SMCs. (A) Light microscopic appearance. (B) Stained with  $\alpha$ -SMA.

**Figure S1**

**A**

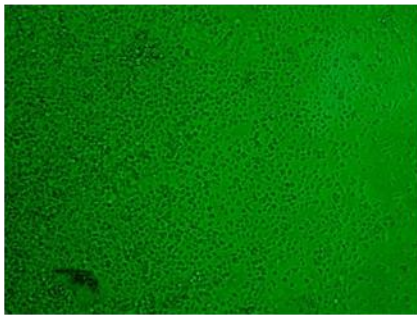

**×200**

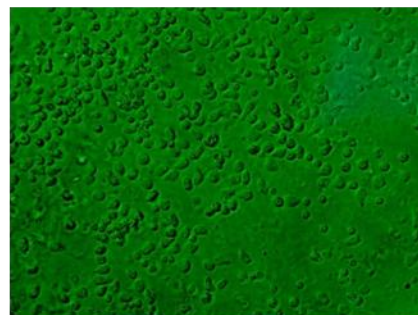

**×400**

**B**

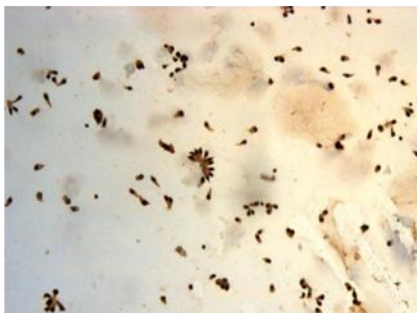

**×200**

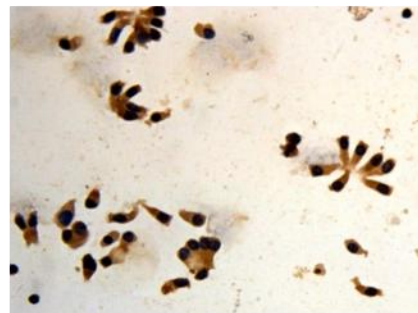

**×400**
